# Supplementary material for: Modification of Acorn Starch Structure and Properties by High Hydrostatic Pressure
Source: MDPI journal article supplement (doi:10.3390/gels9090757), 2023-09-17
Supplement: s1 [file s1]

# Modification of Acorn Starch Structure and Properties by High Hydrostatic Pressure

- <sup>1</sup> CBQF-Centro de Biotecnologia e Química Fina—Laboratório Associado, Escola Superior de Biotecnologia, Universidade Católica Portuguesa, Rua Diogo Botelho 1327, 4169-005 Porto, Portugal; lgcastro@ucp.pt (L.M.G.C.); cfpereira@ucp.pt (C.F.P.); sdsousa@ucp.pt (S.C.S.); mbrassesso@ucp.pt (M.E.B.); mmachado@ucp.pt (M.M.); oramos@ucp.pt (Ó.L.R.)
- <sup>2</sup> LAQV-REQUIMTE—Laboratório Associado, Department of Chemistry, University of Aveiro, 3810-193 Aveiro, Portugal; elisabete.alexandre.pt@gmail.com (E.M.C.A.); jorgesaraiva@ua.pt (J.A.S.)
- <sup>3</sup> Department of Chemistry, University of Aveiro, 3810-193 Aveiro, Portugal; icaco@ua.pt
- \* Correspondence: mpintado@ucp.pt

## Supplementary Materials

**Table S1.** FTIR and XRD characterization of the commercial starch, and *Q. pyrenaica* and *Q. robur* acorn starches extracted under control and optimum conditions.

| Analysis | Parameter | Commercial                 | P0.1/t20                   | P460/t20                   | R0.1/t17.4                 | R333/t17.4                 |
|----------|-----------|----------------------------|----------------------------|----------------------------|----------------------------|----------------------------|
| FTIR     | 1047/1022 | 1.043 ± 0.003 <sup>a</sup> | 1.079 ± 0.001 <sup>b</sup> | 1.055 ± 0.000 <sup>a</sup> | 1.194 ± 0.007 <sup>c</sup> | 1.078 ± 0.001 <sup>b</sup> |
|          | 955/1022  | 1.081 ± 0.005 <sup>a</sup> | 1.172 ± 0.001 <sup>c</sup> | 1.124 ± 0.000 <sup>b</sup> | 1.446 ± 0.016 <sup>d</sup> | 1.181 ± 0.002 <sup>c</sup> |
| XRD      | DPT       | A                          | C                          | C                          | C                          | C                          |
|          | RC (%)    | 29.3 ± 1.3 <sup>b</sup>    | 22.4 ± 1.6 <sup>a</sup>    | 20.1 ± 1.9 <sup>a</sup>    | 20.2 ± 2.3 <sup>a</sup>    | 20.4 ± 1.5 <sup>a</sup>    |

P0.1/t20: *Q. pyrenaica* acorn starch extracted under control conditions (0.1 MPa for 20 min); P460/t20: *Q. pyrenaica* acorn starch extracted under optimum conditions (460 MPa for 20 min); R0.1/t17.4: *Q. robur* acorn starch extracted under control conditions (0.1 MPa for 17.4 min); R333/t17.4: *Q. robur* acorn starch extracted under optimum conditions (333 MPa for 17.4 min); DPT: Diffraction pattern type; RC: Relative crystallinity. Significant differences between starches are represented by lower-case letters and values in the same row with the same letters are not significant ( $p > 0.05$ ).

**Table S2.** Thermodynamical characterization of the commercial starch, and *Q. pyrenaica* and *Q. robur* acorn starches extracted under control and optimum conditions.

| Parameter           | Commercial              | P0.1/t20                 | P460/t20                | R0.1/t17.4               | R333/t17.4              |
|---------------------|-------------------------|--------------------------|-------------------------|--------------------------|-------------------------|
| T <sub>o</sub> (°C) | 67.3 ± 0.5 <sup>b</sup> | 55.4 ± 0.3 <sup>a</sup>  | 56.1 ± 0.6 <sup>a</sup> | 55.0 ± 0.4 <sup>a</sup>  | 55.7 ± 0.3 <sup>a</sup> |
| T <sub>p</sub> (°C) | 72.6 ± 0.5 <sup>c</sup> | 62.9 ± 0.4 <sup>ab</sup> | 63.5 ± 0.3 <sup>b</sup> | 62.3 ± 0.2 <sup>ab</sup> | 61.6 ± 0.9 <sup>a</sup> |
| T <sub>c</sub> (°C) | 77.8 ± 0.3 <sup>b</sup> | 68.6 ± 1.3 <sup>a</sup>  | 66.9 ± 0.6 <sup>a</sup> | 66.8 ± 0.3 <sup>a</sup>  | 66.9 ± 0.6 <sup>a</sup> |
| ΔH (J/g)            | 23.2 ± 2.5 <sup>b</sup> | 12.7 ± 1.5 <sup>a</sup>  | 13.3 ± 0.3 <sup>a</sup> | 11.9 ± 1.3 <sup>a</sup>  | 11.9 ± 1.3 <sup>a</sup> |

P0.1/t20: *Q. pyrenaica* acorn starch extracted under control conditions (0.1 MPa for 20 min); P460/t20: *Q. pyrenaica* acorn starch extracted under optimum conditions (460 MPa for 20 min); R0.1/t17.4: *Q. robur* acorn starch extracted under control conditions (0.1 MPa for 17.4 min); R333/t17.4: *Q. robur* acorn starch extracted under optimum conditions (333 MPa for 17.4 min); T<sub>o</sub>: Onset temperature; T<sub>p</sub>: Peak temperature; T<sub>c</sub>: Conclusion temperature; ΔH: Gelatinization enthalpy. Significant differences between starches are represented by lower-case letters and values in the same row with the same letters are not significant ( $p > 0.05$ ).

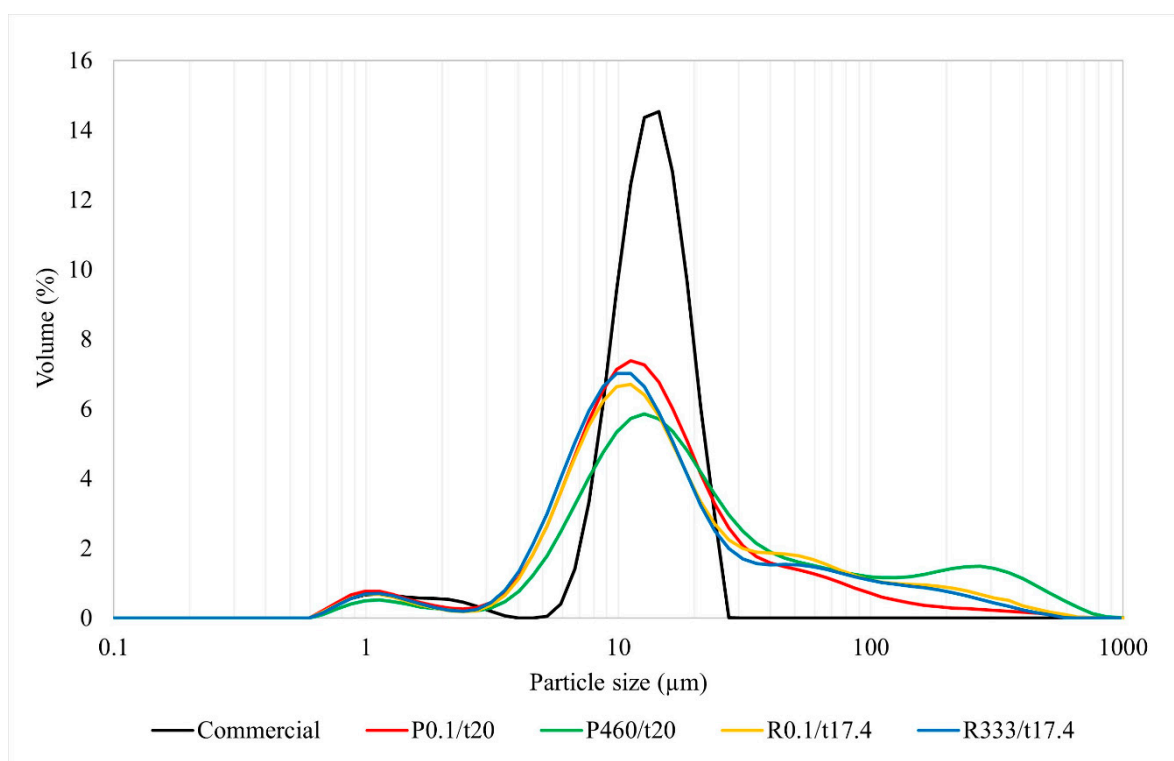

**Figure S1.** Particle size distribution of commercial starch (black line); *Q. pyrenaica* acorn starch extracted under control conditions (red line; 0.1 MPa for 20 min - P0.1/t20); *Q. pyrenaica* acorn starch extracted under optimum conditions (green line; 460 MPa for 20 min - P460/t20); *Q. robur* acorn starch extracted under control conditions (yellow line; 0.1 MPa for 17.4 min - R0.1/t17.4); *Q. robur* acorn starch extracted under optimum conditions (blue line; 333 MPa for 17.4 min - R333/t17.4).

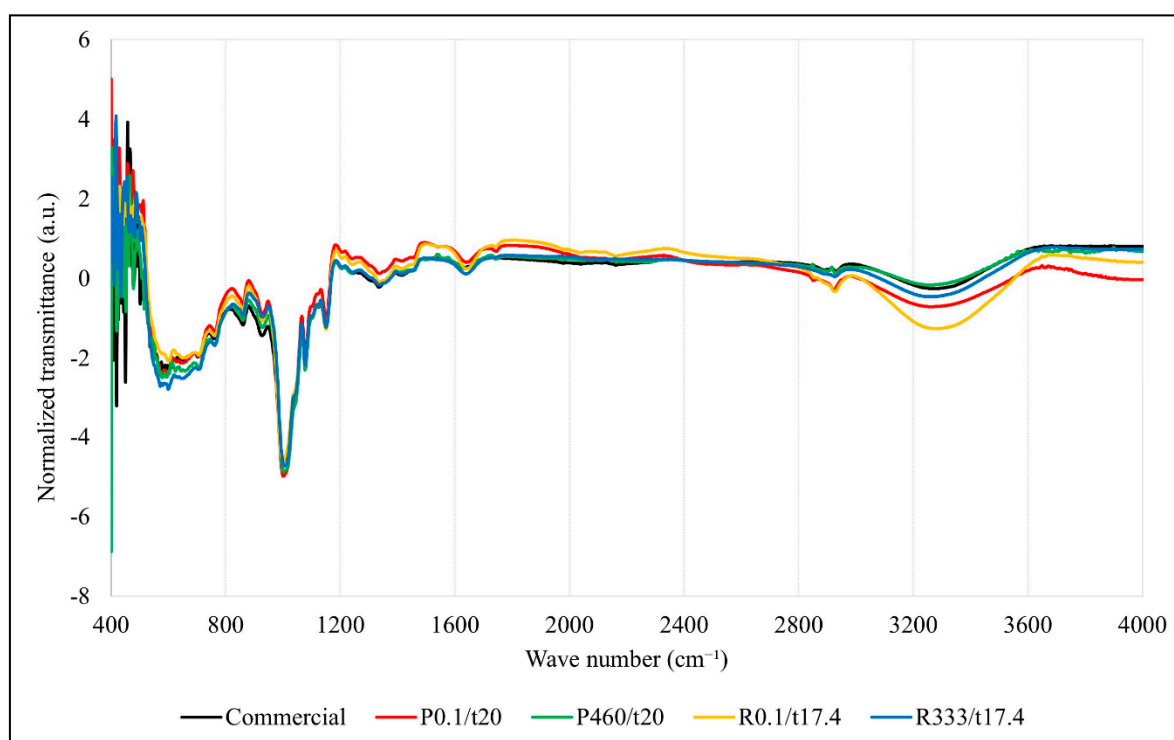

**Figure S2.** FTIR spectra of the commercial starch (black line); *Q. pyrenaica* acorn starch extracted under control conditions (red line; 0.1 MPa for 20 min - P0.1/t20); *Q. pyrenaica* acorn starch extracted under optimum conditions (green line; 460 MPa for 20 min - P460/t20); *Q. robur* acorn starch

extracted under control conditions (yellow line; 0.1 MPa for 17.4 min - R0.1/t17.4); *Q. robur* acorn starch extracted under optimum conditions (blue line; 333 MPa for 17.4 min - R333/t17.4).

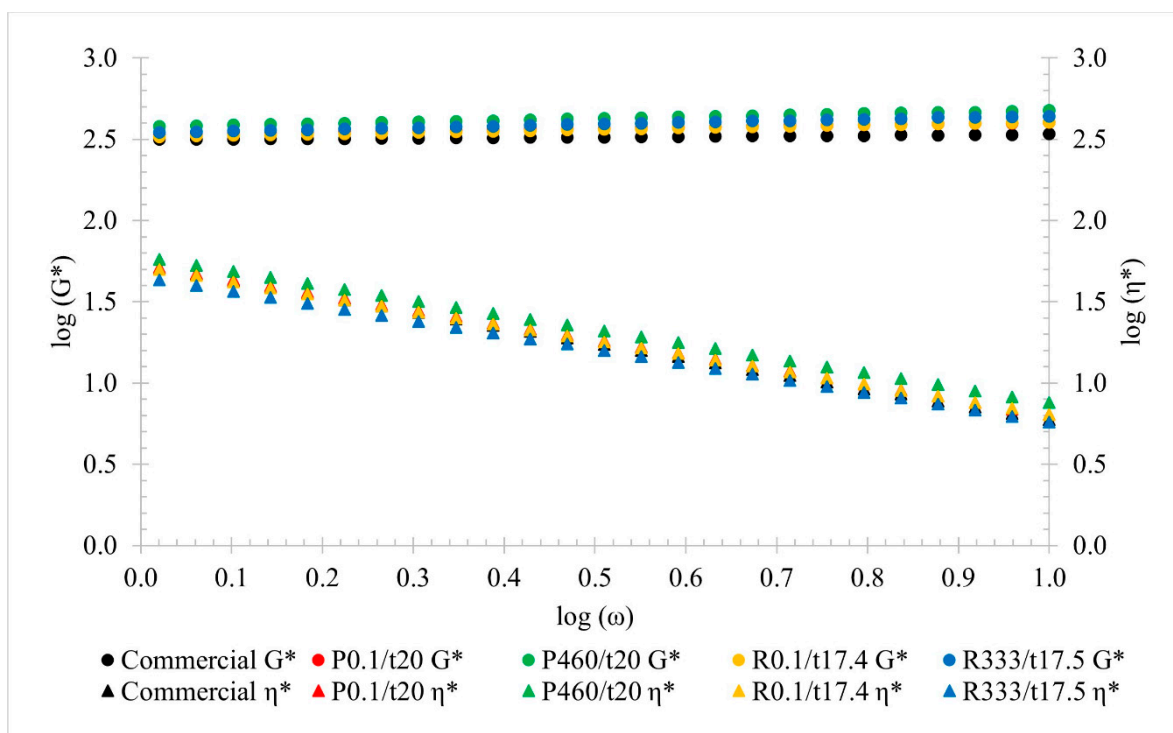

**Figure S3.** Mechanical behaviour regarding complex viscosity ( $\eta^*$ ; circle symbols) and complex modulus ( $G^*$ ; triangle symbols) of the commercial starch (black colour); *Q. pyrenaica* acorn starch extracted under control conditions (red colour; 0.1 MPa for 20 min - P0.1/t20); *Q. pyrenaica* acorn starch extracted under optimum conditions (green colour; 460 MPa for 20 min - P460/t20); *Q. robur* acorn starch extracted under control conditions (yellow colour; 0.1 MPa for 17.4 min - R0.1/t17.4); *Q. robur* acorn starch extracted under optimum conditions (blue colour; 333 MPa for 17.4 min - R333/t17.4);.

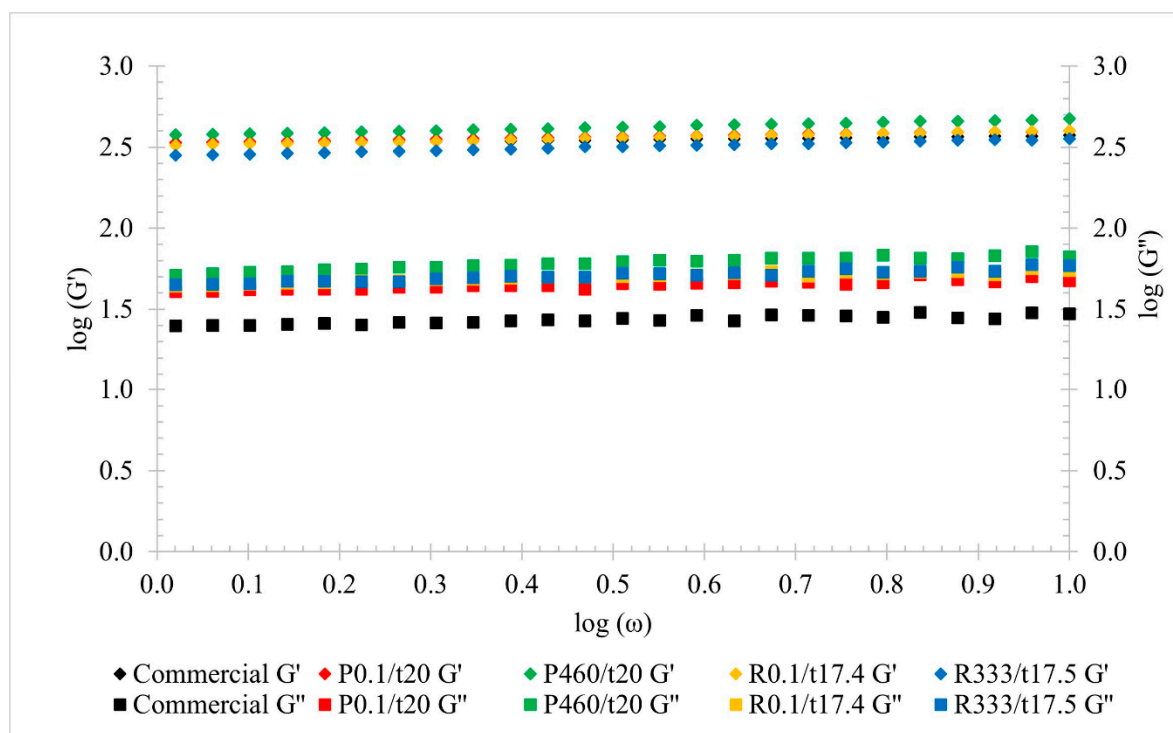

**Figure S4.** Figure S4: Mechanical behaviour regarding the elastic ( $G'$ ; diamond symbols) and viscous ( $G''$ ; square symbols) of the commercial starch (black colour); *Q. pyrenaica* acorn starch extracted under control conditions (red colour; 0.1 MPa for 20 min - P0.1/t20); *Q. pyrenaica* acorn starch extracted under optimum conditions (green colour; 460 MPa for 20 min - P460/t20); *Q. robur* acorn starch extracted under control conditions (yellow colour; 0.1 MPa for 17.4 min - R0.1/t17.4); *Q. robur* acorn starch extracted under optimum conditions (blue colour; 333 MPa for 17.4 min - R333/t17.4).
